# Supplementary material for: MoP4/Ni3S2/MoO3 heterogeneous structure nanorod arrays for efficient solar-enhanced overall water splitting
Source: Royal Society of Chemistry journal article supplement (doi:10.1039/d3ta05330j), 2023-01-01
Supplement: d3ta05330j1.pdf [file d3ta05330j1.pdf]

# Supporting Information

## 1 **MoP<sub>4</sub>/Ni<sub>3</sub>S<sub>2</sub>/MoO<sub>3</sub> heterogeneous structure nanorod arrays** 2 **for efficient solar-enhanced overall water splitting**

3 Yikun Cheng<sup>a</sup>, Pengjie Fu<sup>b</sup>, Xiaodong Yang<sup>b,\*</sup>, Yangrui Zhang<sup>a</sup>, Shan Jin<sup>a</sup>, Huan  
4 Liu<sup>a</sup>, Yunfei Shen<sup>a</sup>, Xuhong Guo<sup>\*,a,c</sup>, Long Chen<sup>\*,a</sup>

5 <sup>a</sup> School of Chemistry and Chemical Engineering/State Key Laboratory Incubation  
6 Base for Green Processing of Chemical Engineering, Shihezi University, Shihezi  
7 832003, China.

8 <sup>b</sup> College of Science, Shihezi University, Shihezi 832003, China.

9 <sup>c</sup> State Key Laboratory of Chemical Engineering, East China University of Science and  
10 Technology, Shanghai 200237, China.

11 First author

12 E-mail address: 1754394006@qq.com

13 \* Corresponding authors

14 E-mail address: chenlong2012@sinano.ac.cn (L. Chen)

15 E-mail address: yangxiaodong1209@hotmail.com (X. Yang)

16 E-mail address: guoxuhong@ecust.edu.cn (X. H. Guo)

## 17 **Experimental section**

### 18 **1.1 Material**

19 All the chemicals were directly used after purchase without further purification:  
20 ammonium molybdate tetrahydrate ((NH<sub>4</sub>)<sub>6</sub>Mo<sub>7</sub>O<sub>24</sub>·4H<sub>2</sub>O, 99.9%), nickel(II) chloride  
21 hexahydrate (NiCl<sub>2</sub>·6H<sub>2</sub>O, 99.9%), sodium hypophosphite (NaH<sub>2</sub>PO<sub>2</sub>·H<sub>2</sub>O, 98%),

---

22 sulfur powder (99.9%), ethanol absolute (99.5%), deionized water (self-prepared by  
23 deionized water machine), potassium hydroxide (KOH, 98%), commercial Pt/carbon  
24 (20 wt %) and ruthenium(IV) oxide (99.9%). Nickel foam (NF, thickness 1.6 mm, 95%)  
25 was cut into the size of 1 × 3 cm, then washed with 1 M hydrochloric acid (HCl)  
26 solution, ethanol absolute, and deionized water under ultrasonication for 15 min to  
27 remove the surface oxide layer and organic residue, respectively. After cleaning with  
28 deionized water, the NF was dried in a vacuum oven for 12 h at 60°C.

## 29 **1.2 Material synthesis**

30 Preparation of Pt/C electrode on Ni foam:

31 The commercial Pt/C (20 mg) was mixed with 500 μL ethanol, 480 μL deionized  
32 water and 20 μL Nafion solution, and the mixture was ultrasonicated for 30 min to  
33 obtain a homogeneous dispersion. Then the dispersed solution was coated onto nickel  
34 foam, followed with the dry in air at room temperature. The loading amount of Pt/C  
35 catalyst on the Ni foam is about 4.8 mg cm<sup>-2</sup>.

36 Preparation of RuO<sub>2</sub> electrode on Ni foam:

37 20 mg RuO<sub>2</sub>, 20 μL Nafion solution, 500 μL ethanol and 480 μL deionized water  
38 were mixed with ultrasonicated for 30 min to obtain a homogeneous dispersion. Then  
39 the dispersion solution was coated onto nickel foam, followed by the dry in air at room  
40 temperature. The loading of RuO<sub>2</sub> on Ni foam is about 4.5 mg cm<sup>-2</sup>.

## 41 **1.3 Material Characterization**

42 The materials (NiMo-PS@NF, NiMo-P@NF, NiMo-S@NF, and NiMo@NF)  
43 electrodes synthesized are reflected by X-ray powder diffractometry (XRD), wherein

---

44 Cu K $\alpha$  radiation ( $\lambda = 0.15406$  nm) 2 theta ranged from 5 to 90°. The surface morphology  
45 was characterized by scanning electron microscopy (SEM) (ZEISS MERLIN Compact,  
46 Germany) and transmission electron microscopy (TEM) (FEI, Tecnai G2 F20 S-Twin,  
47 America). Raman spectroscopy was recorded using a STEX-100 Compact Confocal  
48 Raman spectrometer at 532 nm an argon ion laser as the excitation source. X-ray  
49 photoelectron spectroscopy (XPS) (Thermo, ESCALAB 250XI, America) analyses  
50 were conducted on an equipped with a focused monochromatic Al K $\alpha$  X-ray S-3 source.  
51 The peak energies were calibrated by placing the major C 1s peak at 284.8 eV.

## 52 **1.4 Electrochemical Measurements**

### 53 **1.4.1 Evaluation of the electrocatalytic activity toward HER and OER**

54 The electrochemical test of oxygen evolution reaction (OER) and hydrogen  
55 evolution reaction (HER) are performed at CHI760e electrochemical workstation (CHI  
56 760E, CH Instruments Inc., Shanghai, China). Using Graphite rods, Hg/HgO, and  
57 materials (NiMo-PS@NF, NiMo-P@NF, NiMo-S@NF, and NiMo@NF) electrodes as  
58 the counter electrode, reference electrode, and the working electrode, respectively. The  
59 reaction condition is at 1 M KOH electrolyte 25°C. The plots of electrochemical  
60 impedance spectroscopy (EIS) were collected at an overpotential of 211.8 mV in the  
61 frequency of 0.1 Hz ~ 100 kHz. The LSV curves test for both HER and OER at the scan  
62 rate of 5 mV s<sup>-1</sup>. The LSV curves for the OER reaction were recorded on a voltage of  
63 0.9 to 0.1 V and the HER was recorded at -0.9 to -1.6 V. All measured potentials are  
64 referred to as reversible hydrogen electrodes (RHE) in 1 M KOH by RHE calibration,  
65 as shown in the following equation:

---

66  $E_{(RHE)} = E_{(Hg/HgO)} + 0.098 \text{ V} + 0.0592 \times \text{pH}$  (1)

67 The overpotential ( $\eta$ ) for HER and OER are calculated according to the following  
68 formulations<sup>1</sup>:

69  $\eta_{(OER)} = E_{(RHE)} - 1.23$  (2)

70  $\eta_{(HER)} = E_{(RHE)}$  (3)

#### 71 **1.4.2 Solar-enhanced electrochemical test**

72 For LSV and EIS tests, the working electrode is irradiated under a 500 W Xenon  
73 lamp (CHF-XM500) with an AM 1.5G filter. The simulated light intensity is 250 mW  
74  $\text{cm}^{-2}$  controlled with an optical power meter (PL-MW 2000). Other operations are the  
75 same as 1.3.1.

#### 76 **1.4.3 Calculations of ECSA**

77 The ECSA values of the NiMo-PS@NF, NiMo-P@NF, NiMo-S@NF, and  
78 NiMo@NF catalysts were estimated according to the method reported elsewhere<sup>2,3</sup>. The  
79 double layer capacitance ( $C_{dl}$ ) of catalysts was firstly determined on the basis of the  
80 current density versus the scan rate plots in the region of -0.25 to -0.35 V, in which no  
81 significant Faradaic processes were observed. The electrochemical surface area  
82 (ECSA) of the catalyst was calculated from the Coulombic charge  $Q$  for hydrogen  
83 desorption based on the equation:

84  $ECSA = C_{dl}/C_s$  (4)

85 Where  $C_{dl}$  is the calculated double layer capacitance of the as-prepared samples in  
86 1.0 M KOH (in  $\text{mF cm}^{-2}$ ),  $C_s$  is the specific capacitance for a flat surface ( $40 \mu\text{F cm}^{-2}$   
87 was used here).

---

#### 88 1.4.4 Calculation of turnover frequency (TOF)

89 The TOF calculation of HER is according to the following equation:

$$90 \quad \text{TOF} = j/2Fn \quad (5)$$

91 where  $j$  is the measured current density corresponding to the specific overpotential  
92 in the HER process.  $n$  is the number of active sites ( $\text{mol cm}^{-2}$ ) and  $F$  is the Faraday  
93 constant ( $96485 \text{ C mol}^{-1}$ ). Factor  $1/2$  is presented because two electrons are required to  
94 form one hydrogen molecule. The number of active sites is obtained from the widely  
95 used CV method (Figure S7a-d). Specifically, the CV curves are performed with the  
96 potential window range from 0 V to 0.6 V vs. RHE at a scan rate of  $50 \text{ mV s}^{-1}$  in 1.0 M  
97 PBS (pH=7.2). Then, the surface charge density ( $Q_s$ ) can be obtained by integrating the  
98 CV curve's charge over the whole potential range, the half value of the charge is the  
99  $Q_s$ . After this, the  $n$  value can be calculated according to  $n = Q_s/F$ . Hence, the  $n$  of  
100 NiMo-PS@NF, NiMo-S@NF, NiMo-P@NF, and NiMo@NF are  $3.76 \times 10^{-6}$ ,  $9.82 \times 10^{-6}$ ,  
101  $6.42 \times 10^{-6}$  and  $5.79 \times 10^{-6} \text{ mol cm}^{-2}$ , respectively.

102 The computational formula for TOF of OER was (6),  $j$  - current density ( $\text{A cm}^{-2}$ );  
103  $A$  - surface area ( $1 \text{ cm}^2$ ) of electrodes;  $F$  - Faraday constant ( $96485 \text{ C mol}^{-1}$ ), and  $m$  -  
104 amounts of active sites in the catalysts ( $\text{mol cm}^{-2}$ )<sup>4,5</sup>.

$$105 \quad \text{TOF} = \frac{j * A}{4 * F * m} \quad (6)$$

106 The mounts of active sites in the catalysts ( $m$ ) are obtained by the following  
107 formulation, where  $n$  - the number of electrons transport ( $n = 1$ ),  $R$  - ideal gas constant,  
108 and  $T$  - absolute temperature,  $m$  is obtained by the following formulation.

---


$$\text{slope} = \frac{n^2 * F^2 * A * m}{4 * R * T} \quad (7)$$

#### 110 1.4.5 Evaluation of Faradic efficiency

111 The Faradic efficiency of NiMo-PS@NF electrocatalysts is estimated by  
 112 collecting the amount of O<sub>2</sub> and H<sub>2</sub> produced by continuous electrolysis at 100 mA cm<sup>-2</sup>  
 113 for about 30 min by volumetric method (V<sub>actual</sub>). Then, the theoretical generated O<sub>2</sub>/H<sub>2</sub>  
 114 volumes values (V<sub>theoretical</sub>) are calculated by Faraday's law of electrolysis (  
 115  $Q = N_{O_2/H_2} \times F \times Z$ ) and Ideal Gas Law ( $PV_{O_2/H_2} = N_{O_2/H_2} \times R \times T$ ). Finally, the  
 116 Faradaic efficiency is obtained by comparing the actual volume of oxygen evolution  
 117 with the theoretical one:  $FE = V_{actual} / V_{theoretical}$ <sup>6</sup>

#### 118 1.4.6 STH Conversion Efficiency Calculation

119 For the overall water splitting system that produces hydrogen and oxygen  
 120 molecules using only commercial silicon solar cell as the input, the solar-to-hydrogen  
 121 conversion efficiency (STH) is defined as<sup>40</sup>:

$$STH = \frac{\text{Chemical energy output}}{\text{Solar energy input}} = \frac{j_{op} \times A \times E_f \times FE_{H_2}}{P_s \times A} = \frac{1.23 \times j_{op}}{P_s} \times 100\% \quad (8)$$

124 Here,  $j_{op}$  represents the operating current density of the combined system,  $A$  is the  
 125 effective illuminated area,  $E_f$  is the standard thermodynamic potential difference  
 126 between hydrogen evolution and oxygen evolution half-reactions (1.23 V) that is  
 127 corresponded to the change of Gibbs free energy of overall water splitting,  $FE_{H_2}$  is the  
 128 faradic efficiency for hydrogen evolution and  $P_s$  is the power of solar illumination (AM  
 129 1.5G 100 mW cm<sup>-2</sup>).

#### 130 1.5 DFT Computational Details

131 In this work, The density functional theory (DFT) method was employed to obtain

---

132 the geometric optimizations using the Vienna ab initio simulation package (VASP)<sup>41,42</sup>.  
133 To improve the calculation efficiency, projector augmented wave (PAW)  
134 pseudopotentials were employed to describe the interaction between valence and core  
135 electrons<sup>43,44</sup>. The generalized gradient approximation (GGA) of the Perdew-Burke-  
136 Ernzerhof (PBE) functional is used as the exchange-correlation functional<sup>45-47</sup>. To  
137 prevent interactions between adjacent periodic images, a vacuum region exceeding 20  
138 Å along the z-axis was included. The MoP<sub>4</sub>/MoO<sub>3</sub>, MoP<sub>4</sub>/Ni<sub>3</sub>S<sub>2</sub>/MoO<sub>3</sub>, MoP<sub>4</sub>/NiMoO<sub>4</sub>,  
139 Ni<sub>3</sub>S<sub>2</sub>/MoO<sub>3</sub>, Ni<sub>3</sub>S<sub>2</sub>/NiMoO<sub>4</sub> heterojunction models were constructed for simulation  
140 purposes (all crystal planes are (001) planes), and the Brillouin zone was sampled using  
141 a 4 × 4 × 1 grid centered at the gamma (Γ) point in reciprocal space for structure  
142 optimization<sup>48</sup>. An energy cutoff of 450 eV was applied for the plane-wave expansion  
143 of the electronic eigenfunctions. The geometry optimization was done with a  
144 convergence tolerance of 10<sup>-5</sup> eV for the total energy and all the atoms were allowed to  
145 relax until the force was less than 0.05 eV/Å. The van der Waals interaction was  
146 determined using Grimme's semiempirical dispersion-corrected DFT-D3 scheme<sup>49,50</sup>.

147 
$$E_{ads} = E_{total} - E_{substrate} - E_{adsorbate} \quad (8)$$

148 where  $E_{ads}$  is the adsorption energy of the system,  $E_{total}$ ,  $E_{substrate}$ , and  
149  $E_{adsorbate}$  are the total system energy, catalyst, and adsorption energy, respectively.

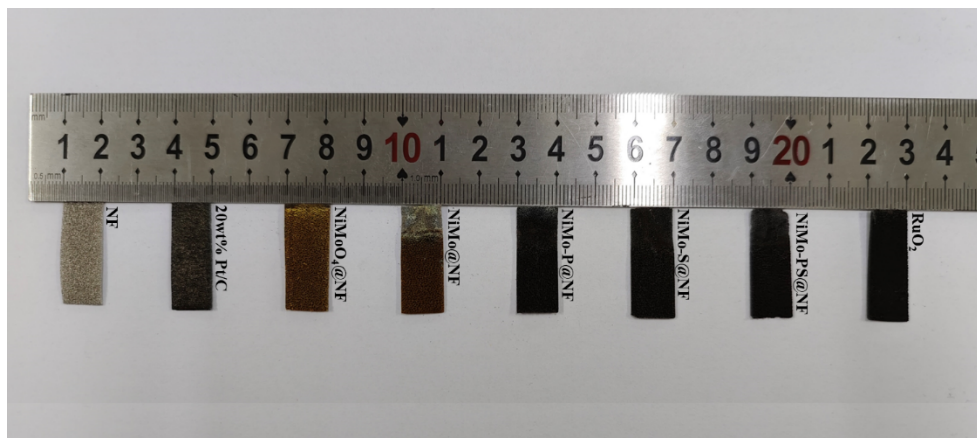

150 Figure S1. Digital image of NF, 20wt% Pt/C, NiMoO<sub>4</sub>/NF, NiMo@NF, NiMo-P@NF,

151 NiMo-S@NF, NiMo-PS@NF, and RuO<sub>2</sub> catalysts.

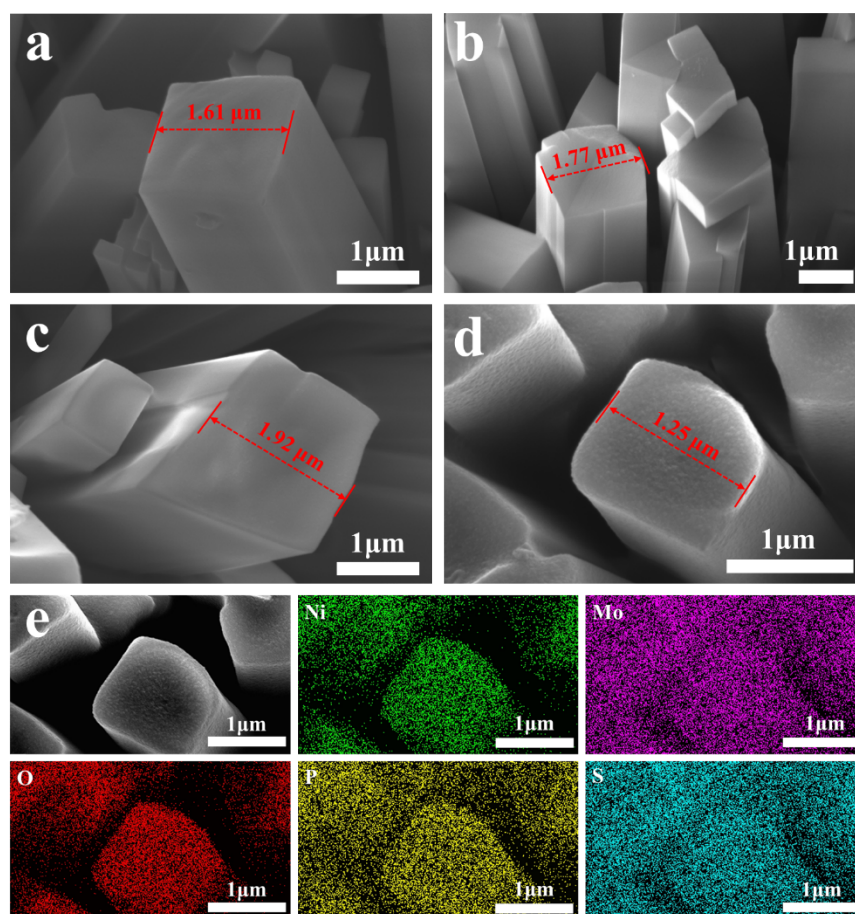



152 Figure S2. (a-d) SEM images of NiMo@NF, NiMo-P@NF, NiMo-S@NF, and NiMo-  
 153 PS@NF. (e) EDS elemental mapping images of NiMo-PS@NF.

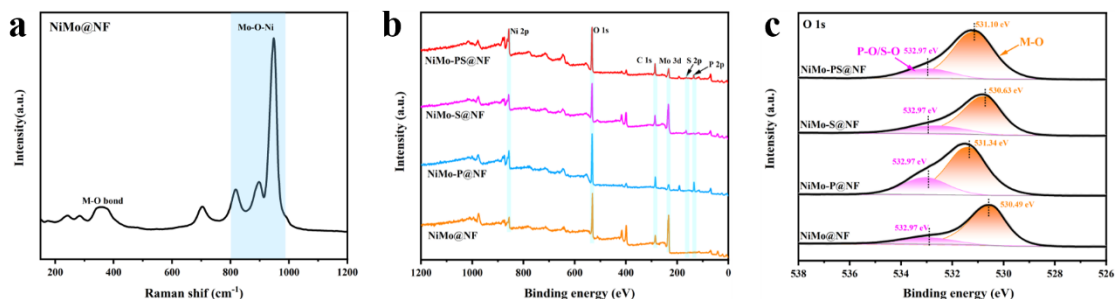

154 Figure S3. (a) Raman spectra of NiMo@NF. (b) XPS survey spectrum of NiMo@NF,  
 155 NiMo-P@NF, NiMo-S@NF, and NiMo-PS@NF. (c) O 1s high-resolution XPS spectra  
 156 of NiMo@NF, NiMo-P@NF, NiMo-S@NF, and NiMo-PS@NF.

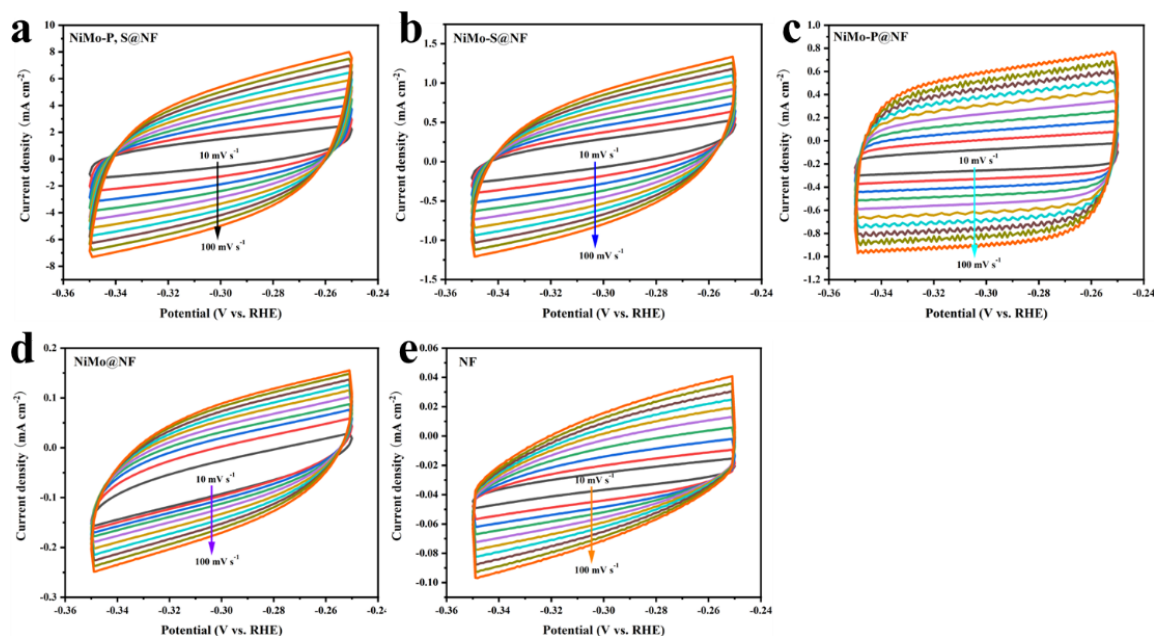

157 Figure S4. CV curves of (a) NiMo-PS@NF, (b) NiMo-S@NF, (c) NiMo-P@NF, (d)  
 158 NiMo@NF, and (e) NF at different scan rates in 1 M KOH.

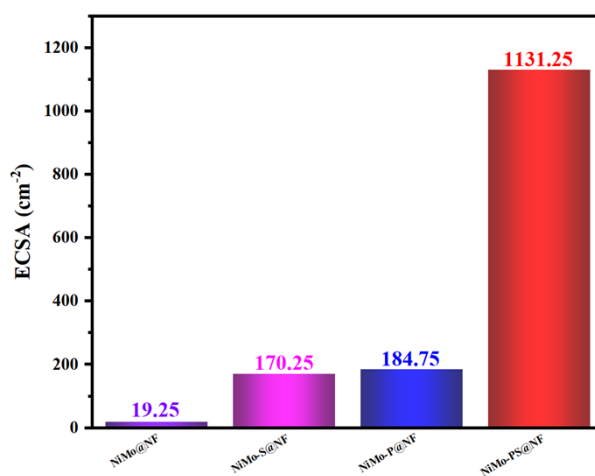

159 Figure S5. ECSA values of NiMo-PS@NF, NiMo-S@NF, NiMo-P@NF, and  
 160 NiMo@NF in HER test.

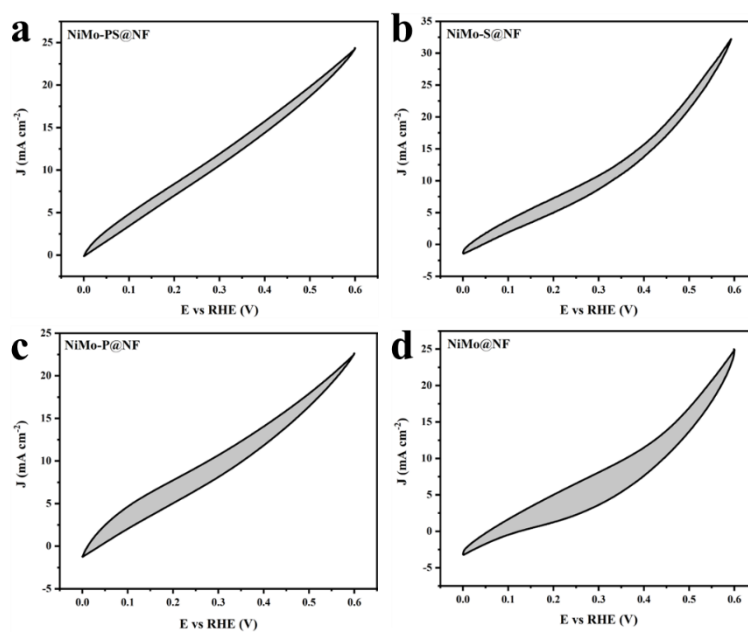

161 Figure S6. CV curves of (a) NiMo-PS@NF, (b) NiMo-S@NF, (c) NiMo-P@NF, and  
 162 (d) NiMo@NF in 1.0 M PBS at a scan rate of 50 mV s<sup>-1</sup>.

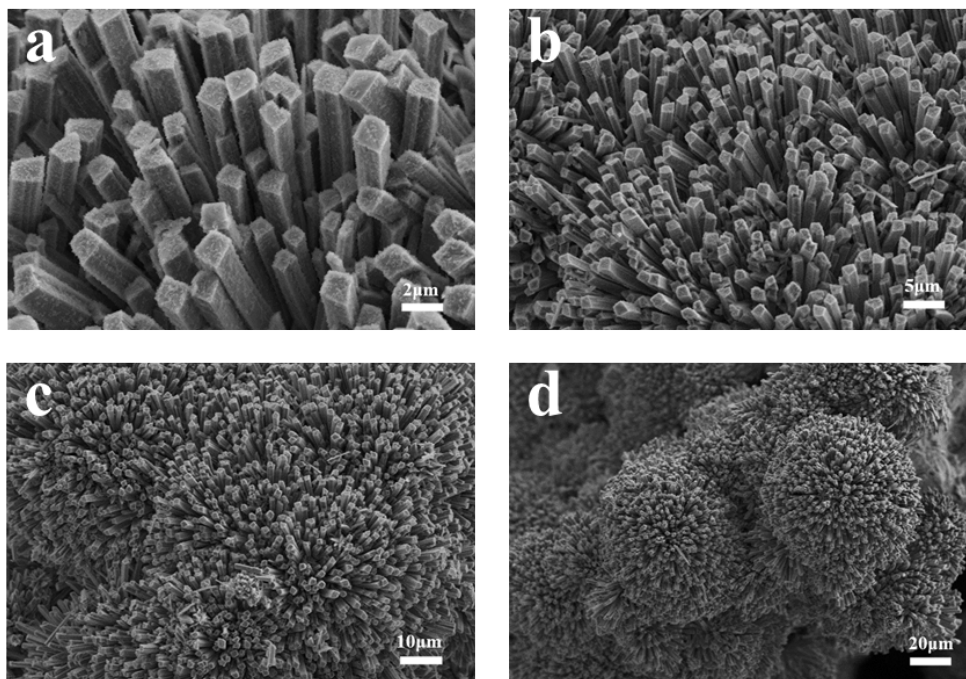

163 Figure S7. (a-d) SEM images of NiMo-PS@NF after HER long-term stability test.

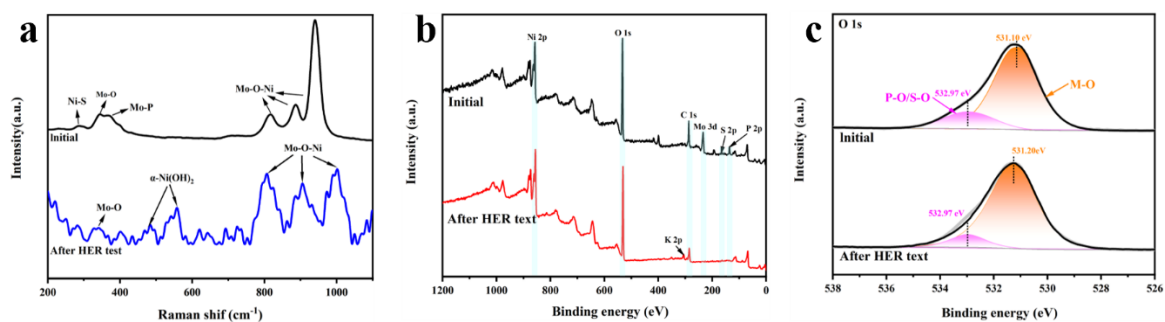

164 Figure S8. (a) Raman spectra of NiMo-PS@NF after HER long-term stability test. (b)

165 XPS survey spectrum and (c) O 1s high-resolution XPS spectra of NiMo-PS@NF

166 before and after HER long-term stability test.

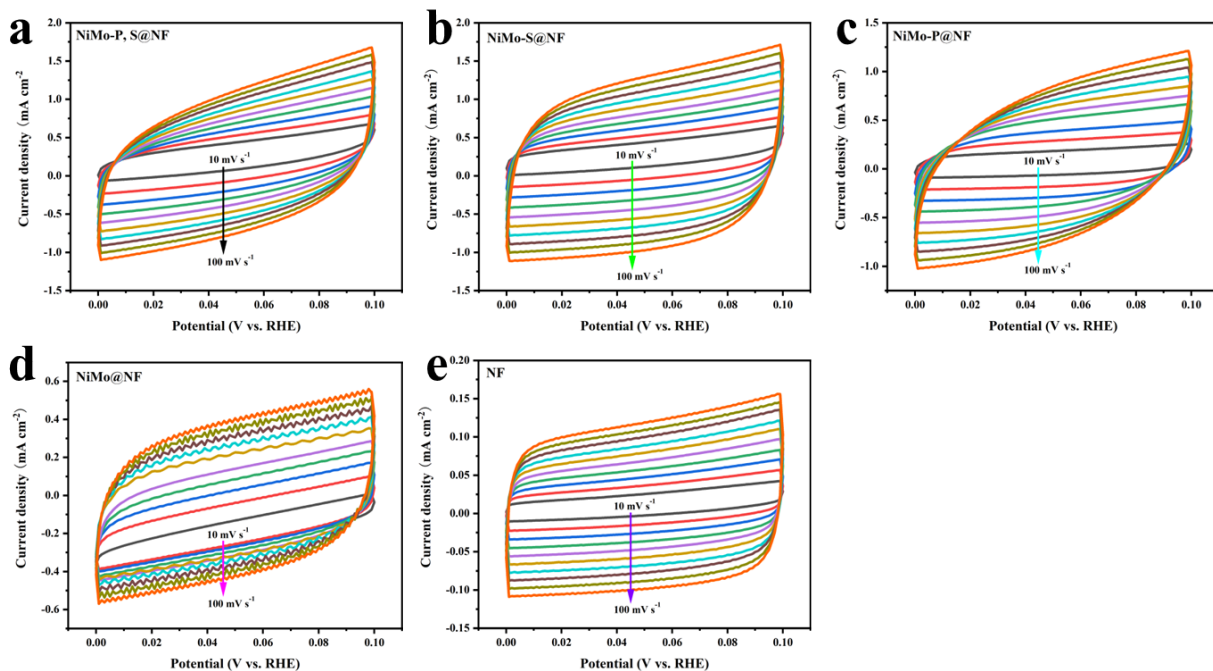

167 Figure S9. CV curves at different scan rates of (a) NiMo-PS@NF, (b) NiMo-S@NF,  
 168 (c) NiMo-P@NF, (d) NiMo@NF, and (e) NF.

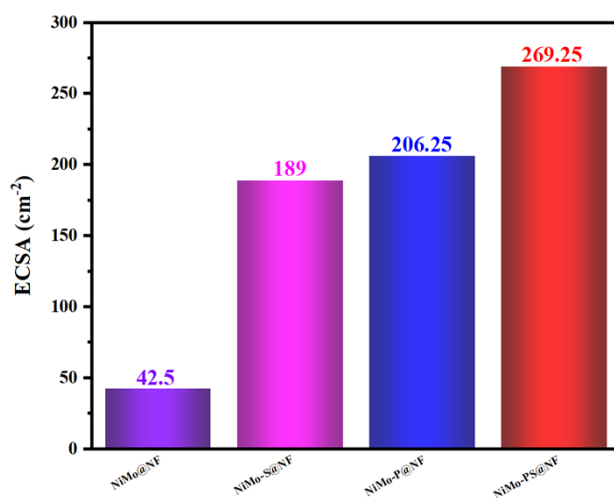

169 Figure S10. ECSA values of NiMo-PS@NF, NiMo-S@NF, NiMo-P@NF, and

170 NiMo@NF in OER test.

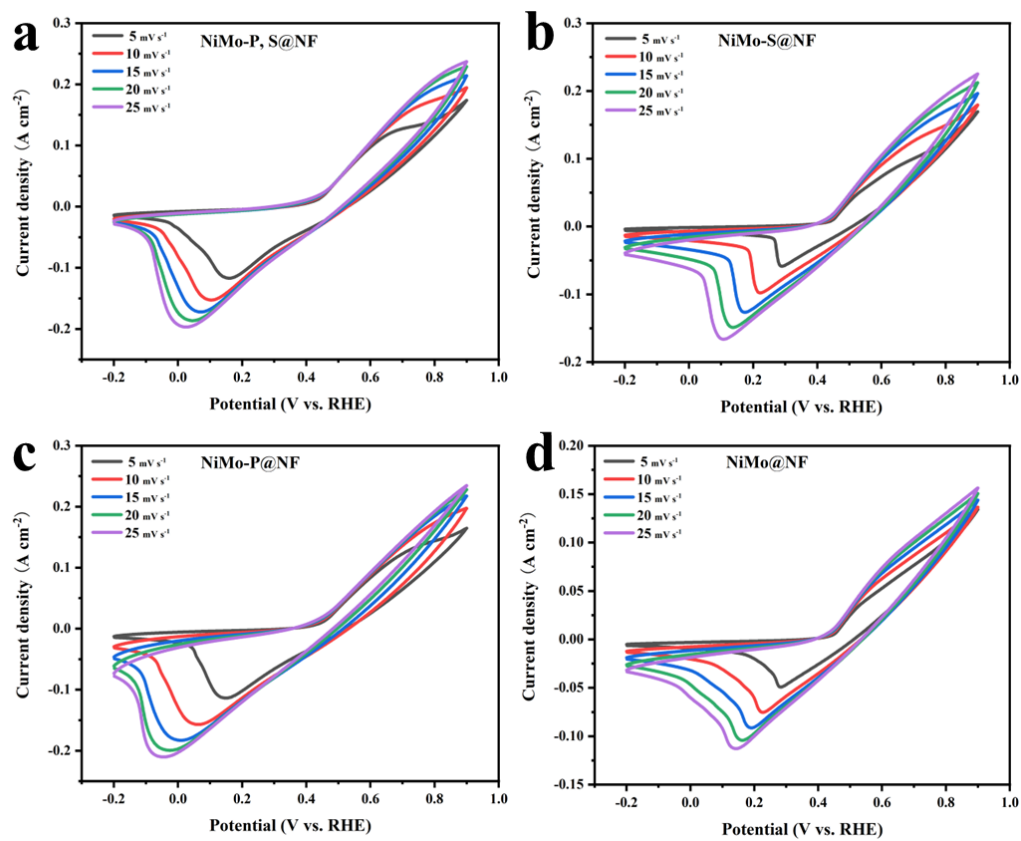

171 Figure S11. CV of (a) NiMo-PS@NF, (b) NiMo-S@NF, (c) NiMo-P@NF and (d)

172 NiMo@NF at different scan rates of 5, 10, 15, 20, and 25 mV s<sup>-1</sup> in 1 M KOH.

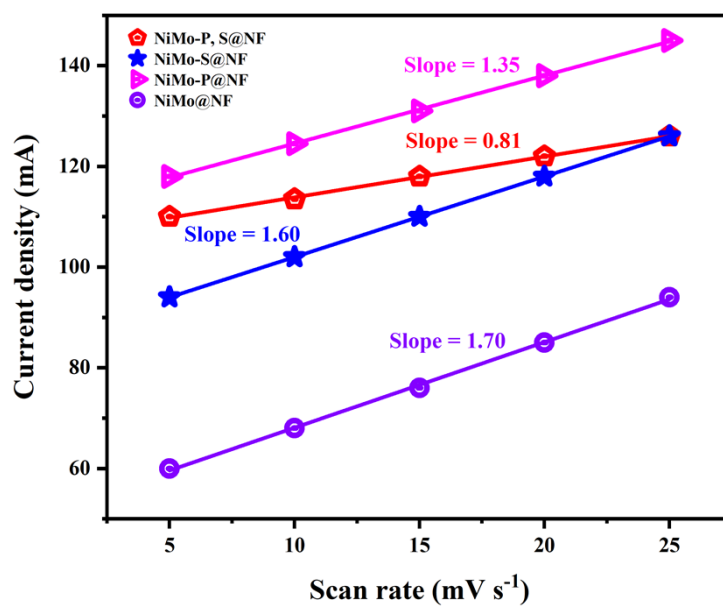

173 Figure S12. Linear relationship of the oxidation peak currents vs. scan rate in the CV

174 of Figure S12a-d.



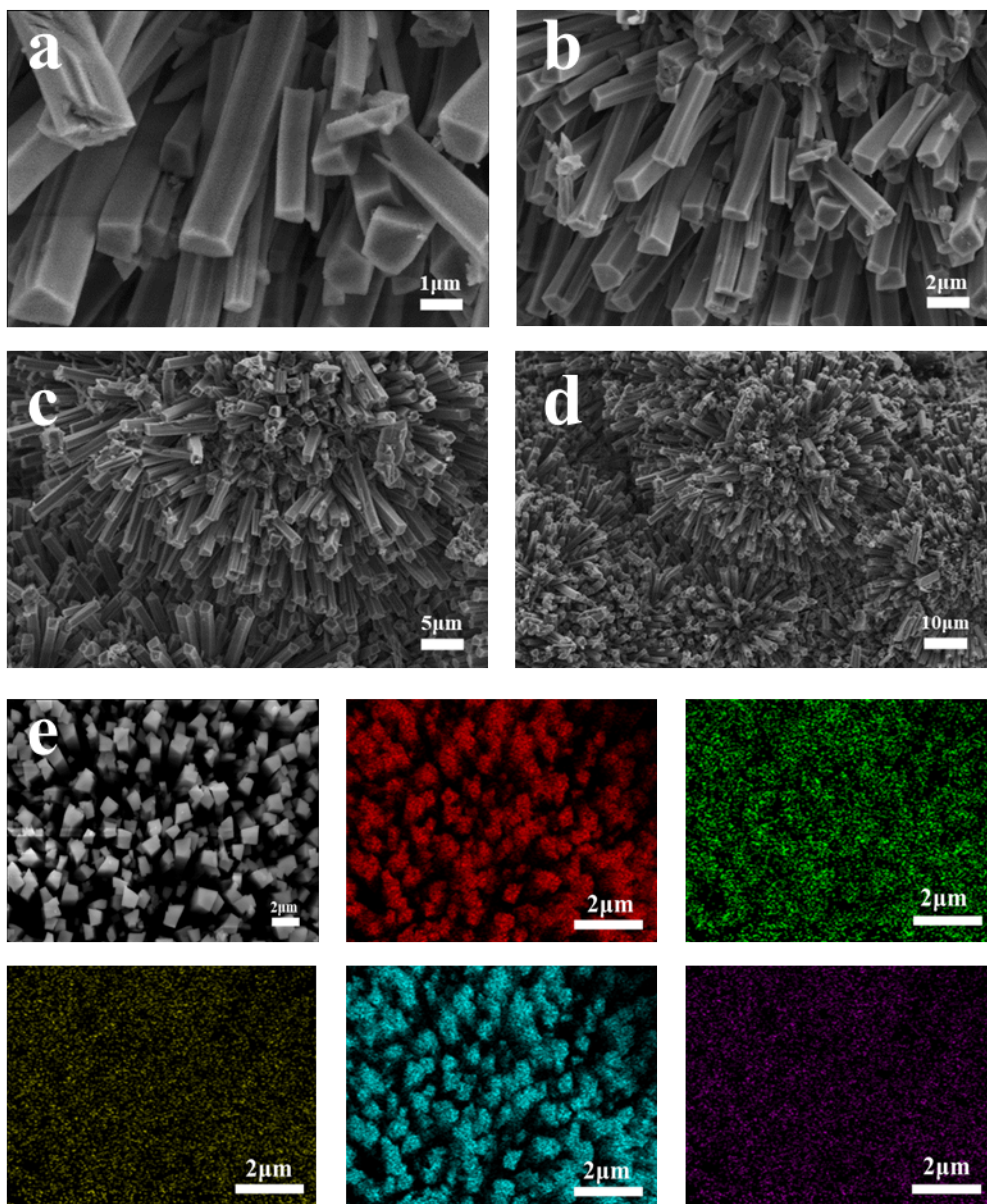

175 Figure S13. (a-d) SEM images, (e) EDS elemental mapping images of NiMo-PS@NF  
176 after OER long-term stability test.

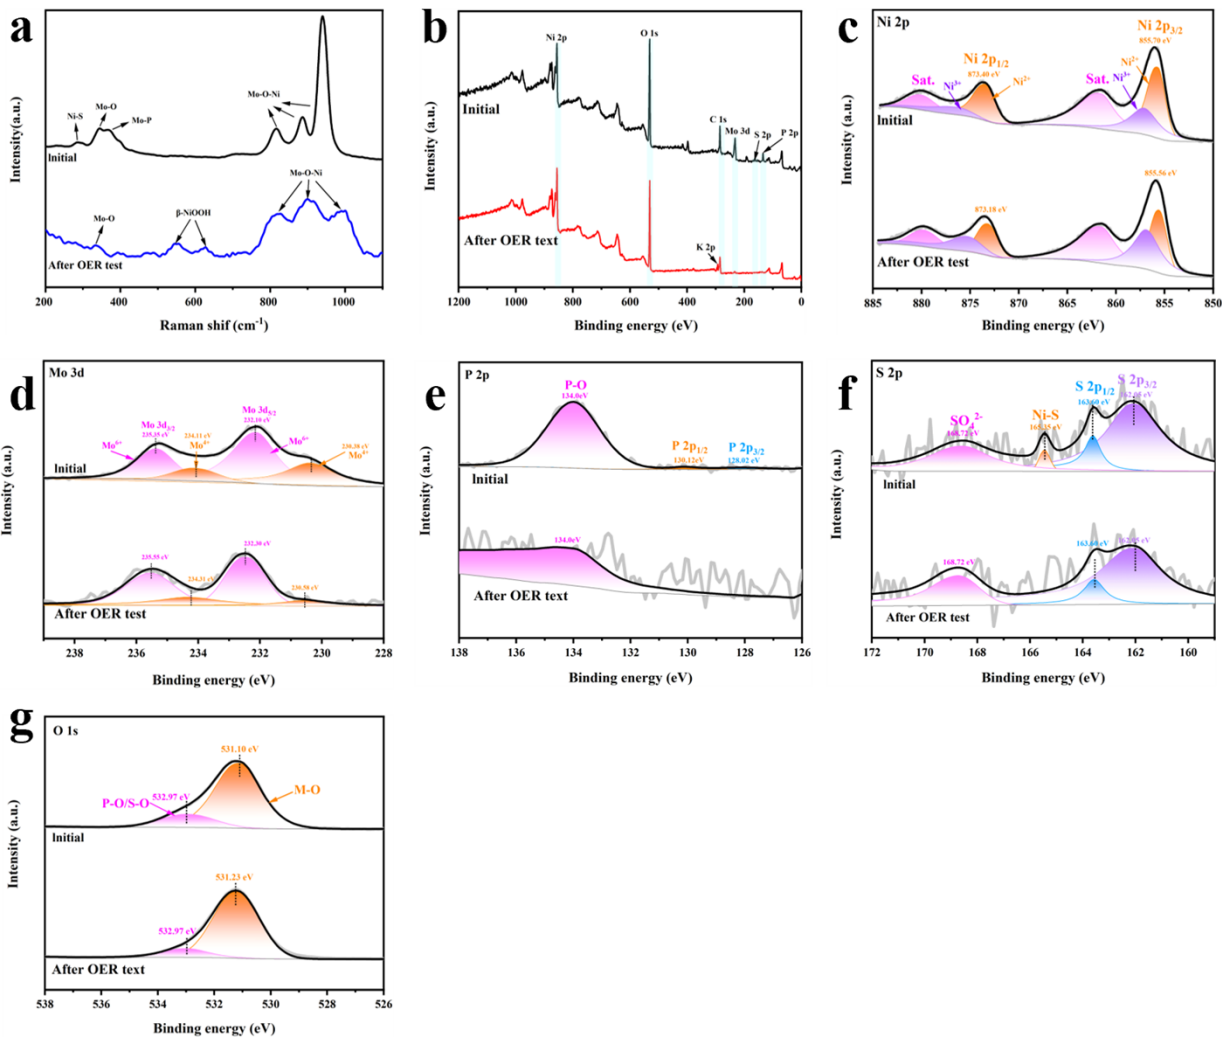

177 Figure S14. (a) Raman spectra, (b) XPS survey spectrum, and high-resolution XPS  
 178 spectra of (c) Ni 2p, (d) Mo 3d, (e) P 2p, (f) S 2p and (g) O 1s of NiMo-PS@NF before  
 179 and after OER long-term stability test.



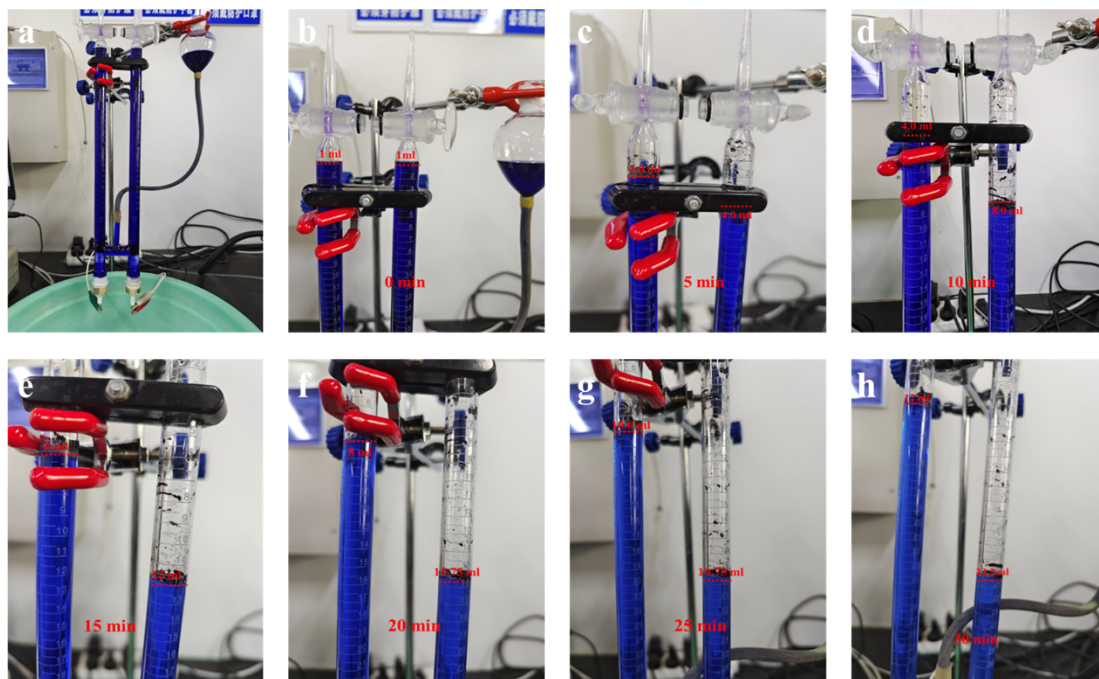

180 Figure S15. (a-h) A series of digital photograph of the Hoffman apparatus was used for  
 181 the measurement of the Faradaic efficiency at  $100 \text{ mA cm}^{-2}$ .

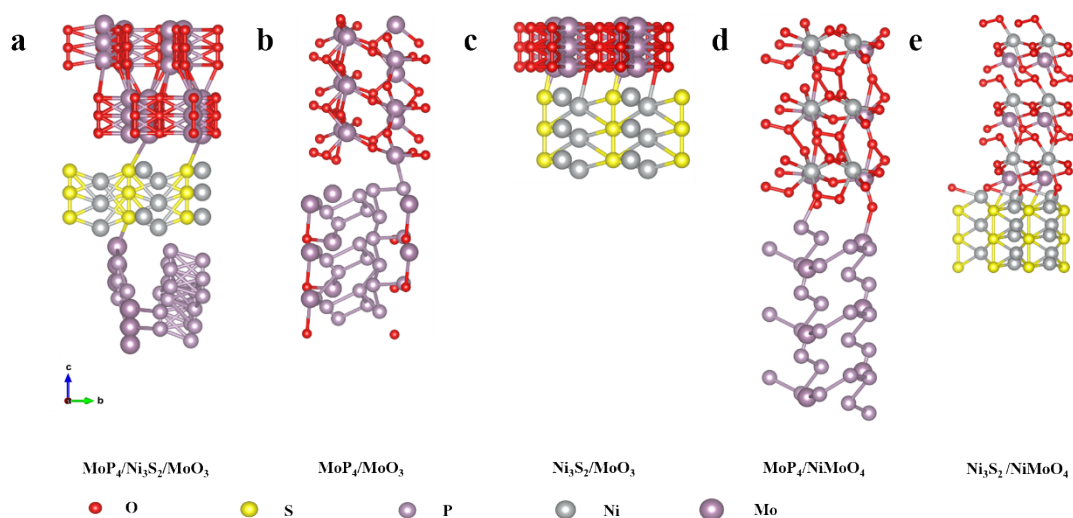

Figure S16. (a-e)  $\text{MoP}_4/\text{Ni}_3\text{S}_2/\text{MoO}_3$ ,  $\text{MoP}_4/\text{MoO}_3$ ,  $\text{Ni}_3\text{S}_2/\text{MoO}_3$ ,  $\text{MoP}_4/\text{NiMoO}_4$ , and  $\text{Ni}_3\text{S}_2/\text{NiMoO}_4$  heterostructures of Schematic models.

Table S1. The impedance value for different samples for HER

| Electrocatalysts     | $R_s$ ( $\Omega$ ) |
|----------------------|--------------------|
| NiMo-PS@NF -Light on | 1.45               |
| NiMo-PS@NF-Light off | 2.31               |
| NiMo-S@NF            | 4.23               |
| NiMo-P@NF            | 6.04               |
| NiMo@NF              | 12.62              |
| NF                   | 50.11              |

Table S2. The impedance value for different samples for OER

| Electrocatalysts     | $R_s$ ( $\Omega$ ) |
|----------------------|--------------------|
| NiMo-PS@NF-Light on  | 0.96               |
| NiMo-PS@NF-Light off | 1.6                |
| NiMo-S@NF            | 1.74               |
| NiMo-P@NF            | 1.99               |
| NiMo@NF              | 9.16               |
| NF                   | 63.88              |

Table S3. Comparison of electrocatalytic HER activity of recently reported electrocatalysts in 1 M KOH electrolyte.

| Catalysts                                                                         | j (mA cm <sup>-2</sup> ) | η (mV) | References                             |
|-----------------------------------------------------------------------------------|--------------------------|--------|----------------------------------------|
| NiMo-PS@NF                                                                        | 10                       | 35     | This work                              |
| Mn <sub>3</sub> (PO <sub>4</sub> ) <sub>2</sub>                                   | 10                       | 109    | Appl. Catal. B, 2021 <sup>7</sup>      |
| Ni-Mo <sub>2</sub> C@NPC                                                          | 10                       | 144    | Appl. Catal. B, 2022 <sup>8</sup>      |
| Mo-NiP <sub>x</sub> /NiS <sub>y</sub>                                             | 10                       | 85     | Adv. Funct. Mater., 2021 <sup>9</sup>  |
| CoNi <sub>2</sub> S <sub>4</sub> /WS <sub>2</sub> /Co <sub>9</sub> S <sub>8</sub> | 10                       | 70     | Appl. Catal. B, 2021 <sup>10</sup>     |
| Ru <sub>0.10</sub> @2H-MoS <sub>2</sub>                                           | 10                       | 51     | Appl. Catal. B, 2021 <sup>11</sup>     |
| CuNi@NiFeCu                                                                       | 10                       | 42     | Appl. Catal. B, 2021 <sup>12</sup>     |
| Au/Ni <sub>3</sub> S <sub>2</sub> /NF                                             | 10                       | 97     | Appl. Catal. B, 2022 <sup>13</sup>     |
| NiSe <sub>2</sub> /Ni <sub>3</sub> Se <sub>4</sub> /NF-4                          | 10                       | 145    | Appl. Catal. B, 2021 <sup>14</sup>     |
| NC/Ni-Mo-N/NF                                                                     | 10                       | 72     | Appl. Catal. B, 2021 <sup>15</sup>     |
| MoS <sub>2</sub> /CoSAs-NS-<br>CNTs@CoS <sub>2</sub> /CC                          | 10                       | 56     | Appl. Catal. B, 2023 <sup>16</sup>     |
| Co/CoP@HOMC                                                                       | 10                       | 120    | Adv. Energy Mater., 2021 <sup>17</sup> |
| La-MoP@NC                                                                         | 10                       | 129.3  | Appl. Catal. B, 2021 <sup>18</sup>     |
| SLC                                                                               | 10                       | 51     | Appl. Catal. B, 2021 <sup>19</sup>     |
| MoP-Ru <sub>2</sub> P/NPC                                                         | 10                       | 47     | Appl. Catal. B, 2021 <sup>20</sup>     |
| Ni <sub>2</sub> P-Ru <sub>2</sub> P/NF                                            | 10                       | 101    | Appl. Catal. B, 2021 <sup>21</sup>     |

Table S4. Comparison of electrocatalytic OER activity of recently reported electrocatalysts in 1 M KOH electrolyte.

| Catalysts                                                           | j (mA cm <sup>-2</sup> ) | $\eta$ (mV) | References                               |
|---------------------------------------------------------------------|--------------------------|-------------|------------------------------------------|
| NiMo-PS@NF                                                          | 100                      | 288.8       | This work                                |
|                                                                     | 10                       | 211.8       |                                          |
| NiFeP/MXene                                                         | 10                       | 286         | Sci. Bull., 2021 <sup>22</sup>           |
| Au/Ni <sub>3</sub> S <sub>2</sub> /NF                               | 10                       | 230         | Appl. Catal. B, 2022 <sup>13</sup>       |
| Mn <sub>1.5</sub> Co <sub>1.5</sub> (PO <sub>4</sub> ) <sub>2</sub> | 10                       | 254         | Appl. Catal. B, 2021 <sup>7</sup>        |
| Co(OH) <sub>2</sub> /NiMo<br>CA@CC                                  | 10                       | 267         | Adv. Funct. Mater., 2021 <sup>23</sup>   |
| Fe <sub>0.6</sub> Co <sub>0.4</sub> Se <sub>2</sub>                 | 10                       | 270         | Energy Environ. Sci., 2021 <sup>24</sup> |
| NiCoFe-NDA/NF                                                       | 10                       | 215         | Energy Environ. Sci., 2021 <sup>25</sup> |
| CoMoOS-100                                                          | 10                       | 281         | Appl. Catal. B, 2020 <sup>26</sup>       |
| CM (1:0.1)                                                          | 10                       | 300         | Sci. Bull., 2020 <sup>27</sup>           |
| Co/CoP@HOMC                                                         | 10                       | 260         | Adv. Energy Mater., 2021 <sup>17</sup>   |
| Co@N-CS/N-HCP@CC                                                    | 10                       | 248         | Adv. Energy Mater., 2019 <sup>28</sup>   |
| (Ru-Ni)O <sub>x</sub>                                               | 10                       | 237.2       | Appl. Catal. B, 2021 <sup>29</sup>       |
| NCO-Ag-4.1V                                                         | 10                       | 297         | Appl. Catal. B, 2021 <sup>30</sup>       |
| <i>so</i> -Fe-Ni(OH) <sub>2</sub> TTAs with<br>45.7 at% Fe          | 10                       | 226         | Appl. Catal. B, 2021 <sup>31</sup>       |
| CoP-B1                                                              | 10                       | 297         | Appl. Catal. B, 2021 <sup>32</sup>       |

|                                    |    |     |                                    |
|------------------------------------|----|-----|------------------------------------|
| A-FeCoSeO <sub>x</sub> -100 HoNPrs | 10 | 294 | Appl. Catal. B, 2020 <sup>33</sup> |
|------------------------------------|----|-----|------------------------------------|

Table S5. Comparison of electrocatalytic overall water splitting activity of recently reported electrocatalysts in 1 M KOH electrolyte.

| Catalysts                                                                                                                                        | J<br>(mA cm <sup>-2</sup> ) | Potential<br>(V) | References                             |
|--------------------------------------------------------------------------------------------------------------------------------------------------|-----------------------------|------------------|----------------------------------------|
| NiMo-PS@NF   NiMo-<br>PS@NF                                                                                                                      | 10<br>100                   | 1.391<br>1.711   | This work                              |
| Pt/C  RuO <sub>2</sub>                                                                                                                           | 10                          | 1.571            |                                        |
| (Ru-Ni)O <sub>x</sub>   (Ru-Ni)O <sub>x</sub>                                                                                                    | 10                          | 1.48             | Appl. Catal. B, 2021 <sup>29</sup>     |
| Co@N-CS/N-HCP@CC//<br>Co@N-CS/N-HCP@CC                                                                                                           | 10                          | 1.545            | Adv. Energy Mater., 2019 <sup>28</sup> |
| Mo-Ni <sub>3</sub> S <sub>2</sub> /Ni <sub>x</sub> P <sub>y</sub> /NF//Mo-<br>Ni <sub>3</sub> S <sub>2</sub> /Ni <sub>x</sub> P <sub>y</sub> /NF | 10                          | 1.46             | Adv. Energy Mater., 2020 <sup>34</sup> |
| NiFeP/MXene//Pt/C                                                                                                                                | 10                          | 1.61             | Sci. Bull., 2021 <sup>22</sup>         |
| Mn <sub>1.5</sub> Co <sub>1.5</sub> //Mn <sub>1.5</sub> Co <sub>1.5</sub>                                                                        | 10                          | 1.54             | Appl. Catal. B, 2021 <sup>7</sup>      |
| SLC//SLC                                                                                                                                         | 10                          | 1.49             | Appl. Catal. B, 2021 <sup>19</sup>     |
| CuNi@Ni-FeCu/CP//                                                                                                                                | 10                          | 1.51             | Appl. Catal. B, 2021 <sup>12</sup>     |

---

|                                                              |    |      |                                        |
|--------------------------------------------------------------|----|------|----------------------------------------|
| CuNi@Ni-FeCu/CP                                              |    |      |                                        |
| Co/CoP@HOMC//                                                |    |      |                                        |
| Co/CoP@HOMC                                                  | 10 | 1.54 | Adv. Energy Mater., 2021 <sup>17</sup> |
| Au/Ni <sub>3</sub> S <sub>2</sub> /NF//                      |    |      |                                        |
| Au/Ni <sub>3</sub> S <sub>2</sub> /NF                        | 10 | 1.52 | Appl. Catal. B, 2022 <sup>13</sup>     |
| Mo <sub>2</sub> C-CoO@N-CNFs//                               |    |      |                                        |
| Mo <sub>2</sub> C-CoO@N-CNFs                                 | 10 | 1.56 | Chem. Eng. J., 2023 <sup>35</sup>      |
| Co@CoMoO <sub>x</sub> -α-                                    |    |      |                                        |
| CrOOH/NF//                                                   |    |      |                                        |
| Co@CoMoO <sub>x</sub> -α-                                    | 10 | 1.57 | Chem. Eng. J., 2023 <sup>36</sup>      |
| CrOOH/NF                                                     |    |      |                                        |
| Ni(S <sub>0.5</sub> 1Se <sub>0.49</sub> ) <sub>2</sub> @NC// |    |      |                                        |
| Ni(S <sub>0.5</sub> 1Se <sub>0.49</sub> ) <sub>2</sub> @NC   | 10 | 1.59 | Adv. Funct. Mater., 2022 <sup>37</sup> |
| Ni/NiFe <sub>2</sub> O <sub>4</sub> @PPy//                   |    |      |                                        |
| Ni/NiFe <sub>2</sub> O <sub>4</sub> @PPy                     | 10 | 1.64 | Chem. Eng. J., 2023 <sup>38</sup>      |
| NiFe//MoP-Ru <sub>2</sub> P/NPC-                             |    |      |                                        |
| NiFe                                                         | 10 | 1.49 | Appl. Catal. B, 2021 <sup>20</sup>     |
| Ni <sub>2</sub> P-Ru <sub>2</sub> P/NF//Ni <sub>2</sub> P-   |    |      |                                        |
| Ru <sub>2</sub> P/NF                                         | 10 | 1.45 | Appl. Catal. B, 2021 <sup>21</sup>     |
| NiSe <sub>2</sub> /Ni <sub>3</sub> Se <sub>4</sub> /NF-      |    |      |                                        |
| 1//NiSe <sub>2</sub> /Ni <sub>3</sub> Se <sub>4</sub> /NF-4  | 10 | 1.56 | Appl. Catal. B, 2022 <sup>39</sup>     |

---

---

## References

- [1] Y. Luo, X. Yang, L. He, Y. Zheng, J. Pang, L. Wang, R. Jiang, J. Hou, X. Guo and L. Chen, ACS Appl. Mater. Interfaces, 2022, **14**, 46374-46385.
- 2 W. He, X. Zheng, J. Peng, H. Dong, J. Wang and W. Zhao, Chem. Eng. J., 2020, **396**, 125227.
- 3 J. Zhu, S. Li, M. Xiao, X. Zhao, G. Li, Z. Bai, M. Li, Y. Hu, R. Feng, W. Liu, R. Gao, D. Su, A. Yu and Z. Chen, Nano Energy, 2020, **77**, 105212.
- 4 X. Wu, J. Qiu and Z. Wang, Small Struct., 2022, **4**, 42200268.
- 5 Z. Wang, J. Zhang, Q. Yu, H. Yang, X. Chen, X. Yuan, K. Huang and X. Xiong, Chem. Eng. J., 2021, **410**, 128366.
- 6 J. Han, J. Zhang, T. Wang, Q. Xiong, W. Wang, L. Cao and B. Dong, ACS Sustain. Chem. Eng., 2019, **7**, 13105-13114.

- 
- 7 D. Chinnadurai, R. Rajendiran, O. Li and K. Prabakar, *Appl. Catal., B*, 2021, **292**, 120202.
- 8 Y. Lu, C. Yue, Y. Li, W. Bao, X. Guo, W. Yang, Z. Liu, P. Jiang, W. Yan, S. Liu, Y. Pan and Y. Liu, *Appl. Catal., B*, 2021, **296**, 120336.
- 9 J. Wang, M. Zhang, G. Yang, W. Song, W. Zhong, X. Wang and M. Wang, *Adv. Funct. Mater.*, 2021, **31**, 2101532.
- 10 M. Ma, J. Xu, H. Wang, X. Zhang, S. Hu, W. Zhou and H. Liu, *Appl. Catal., B*, 2021, **297**, 120455.
- 11 J. Wang, W.i Fang, Y. Hu, Y. Zhang, J. Dang, Y. Wu, B. Chen, H. Zhao and Z. Li, *Appl. Catal., B*, 2021, **298**, 120490.
- 12 D. Cao, H. Xu and D. Cheng, *Appl. Catal., B*, 2021, **298**, 120600.
- 13 H. Liu, J. Cheng, W. He, Y. Li, J. Mao, X. Zheng, C. Chen, C. Cui and Q. Hao, *Appl. Catal., B*, 2022, **304**, 120935.
- 14 L. Tan, J. Yu, H. Wang, H. Gao, X. Liu, L. Wang, X. She and T. Zhan, *Appl. Catal., B*, 2022, **298**, 120915.
- 15 Y. Xu, M. Liu, S. Wang, K. Ren, M. Wang, Z. Wang, X. Li, L. Wang and H. Wang, *Appl. Catal., B*, 2021, **298**, 120493.
- 16 B. Liu, Y. Cheng, B. Cao, M. Hu, P. Jing, R. Gao, Y. Du, J. Zhang and J. Liu, *Appl. Catal., B*, 2021, **298**, 120630.
- 17 W. Li, J. Liu, P. Guo, H. Li, B. Fei, Y. Guo, H. Pan, D. Sun, F. Fang and R. Wu, *Adv. Energy Mater.*, 2021, **11**, 2102134.
- 18 P. Wei, X. Li, Z. He, Z. Li, X. Zhang, X. Sun, Q. Li, H. Yang, J. Han and Y. Huang, *Appl. Catal., B*, 2021, **299**, 120657
- 19 Y. Feng, Z. Li, C. Cheng, W. Kang, J. Mao, G. Shen, J. Yang, C. Dong, H. Liu and X. Du, *Appl. Catal., B*, 2021, **299**, 120658.
- 20 Y. Gao, Z. Chen, Y. Zhao, W. Yu, X. Jiang, M. He, Z. Li, T. Ma, Z. Wu and L. Wang, *Appl. Catal., B*, 2022, **303**, 120879.
- 21 S. Yang, J. Zhu, X. Chen, M. Huang, S. Cai, J. Han and J. Li, *Appl. Catal., B*, 2022, **304**, 120914.



- 
- 22 J. Chen, Q. Long, K. Xiao, T. Ouyang, N. Li, S. Ye and Z. Liu, *Sci. Bull.*, 2021, **66**, 1063-1072.
- 23 Q. Zhang, W. Xiao, W. Guo, Y. Yang, J. Lei, H. Luo and N. Li, *Adv. Funct. Mater.*, 2021, **31**, 2102117.
- 24 J. Zhang, Y. Yan, B. Mei, R. Qi, T. He, Z. Wang, W. Fang, S. Zaman, Y. Su, S. Ding and B. Xia, *Energy Environ. Sci.*, 2021, **14**, 365-373.
- 25 K. Yue, J. Liu, Y. Zhu, C. Xia, P. Wang, J. Zhang, Y. Kong, X. Wang, Y. Yan and B. Xia, *Energy Environ. Sci.*, 2021, **14**, 6546.
- 26 H. Xu, H. Shang, C. Wang, L. Jin, C. Chen, C. Wang and Y. Du, *Appl. Catal., B*, 2020, **265**, 118605.
- 27 Y. Lu, D. Fan, Z. Chen, W. Xiao, C. Cao and X. Yang, *Sci. Bull.*, 2020, **65**, 460-466.
- 28 Z. Chen, Y. Ha, H. Jia, X. Yan, M. Chen, M. Liu and R. Wu, *Adv. Energy Mater.*, 2019, **9**, 1803918.
- 29 H. Zhang, Y. Lv, C. Chen, C. Lv, X. Wu, J. Guo and D. Jia, *Appl. Catal., B*, 2021, **298**, 120611.
- 30 L. Sun, Z. Dai, L. Zhong, Y. Zhao, Y. Cheng, S. Chong, G. Chen, C. Yan, X. Zhang, H. Tan, L. Zhang, K. N. Dinh, S. Li, F. Ma and Q. Yan, *Appl. Catal., B*, 2021, **297**, 120477.
- 31 Z. Shi, J. Zhao, C. Li, H. Xu and G. Li, *Appl. Catal., B*, 2021, **298**, 120558
- 32 G. Yuan, J. Bai, L. Zhang, X. Chen and L. Ren, *Appl. Catal., B*, 2021, **284**, 119693.
- 33 Q. Qian, Y. Li, Y. Liu and G. Zhang, *Appl. Catal., B*, 2020, **266**, 118642.
- 34 X. Luo, P. Ji, P. Wang, R. Cheng, D. Chen, C. Lin, J. Zhang, J. He, Z. Shi, N. Li, S. Xiao and S. Mu, *Adv. Energy Mater.*, 2020, **10**, 1903891.
- 35 T. Gong, J. Zhang, Y. Liu, L. Hou, J. Deng and C. Yuan, *Chem. Eng. J.*, 2023, **451**, 139025.
- 36 S. Lim, C. Chiang, C. Peng, W. Wu, Y. Lin, Y. Lin, C. Chen and Y. Lin, *Chem. Eng. J.*, 2023, **452**, 139715.
- 37 K. Ding, J. Hu, W. Jin, L. Zhao, Y. Liu, Z. Wu, B. Weng, H. Hou and X. Ji, *Adv.*

- 
- Funct. Mater., 2022, **32**, 2201944.
- 38 L. Jia, G. Du, D. Han, Y. Wang, W. Zhao, Q. Su, S. Ding and B. Xu, Chem. Eng. J., 2023, **454**, 140278.
- 39 L. Tan, J. Yu, H. Wang, H. Gao, X. Liu, L. Wang, X. She and T. Zhan, Appl. Catal., B, 2022, **303**, 120915.
- 40 P. Sun, Y. Zhou, H. Li, H. Zhang, L. Feng, Q. Cao, S. Liu, T. Wågberg and G. Hu, Appl. Catal., B, 2022, **310**, 121354.
- 182 41 G. Kresse, J. Furthmüller and Comput. Mater. Sci., 1996, **6**, 15-50.
- 183 42 G. Kresse and J. Furthmüller, Matter Mater. Phys., 1996, **54**, 11169-11186.
- 184 43 M. Gajdoš, K. Hummer, G. Kresse, J. Furthmüller and F. Bechstedt, Matter Mater. Phys., 2006, **73**, 045112.
- 185
- 186 44 A. D. Becke, J. Chem. Phys., 1993, **98**, 5648-5652.
- 187 45 J. P. Perdew, J. A. Chevary, S. H. Vosko, K. A. Jackson, M. R. Pederson, D. J. Singh and C. Fiolhais, Matter Mater. Phys., 1992, **46**, 6671-6687.
- 188
- 189 46 M. Ernzerhof and G. E. Scuseria, J. Chem. Phys., 1999, **110**, 5029-5036.
- 190 47 J. C. Sancho-García, J. L. Brédas and J. Cornil, Chem. Phys. Lett., 2003, **377**, 63-68.
- 191
- 192 48 W. Li, L. Kong, C. Chen, J. Gou, S. Sheng, W. Zhang, H. Li, L. Chen, P. Cheng and K. Wu, Sci. Bull., 2018, **63**, 282-286.
- 193
- 194 49 S. Grimme, J. Antony, S. Ehrlich and H. Krieg, J. Chem. Phys., 2010, **132**, 154104.
- 195
- 50 S. Grimme, S. Ehrlich and L. Goerigk, J. Comp. Chem., 2011, **32**, 1456-1465.
